# Supplementary material
Source: PubMed Central journal article supplement (PMC4393509)

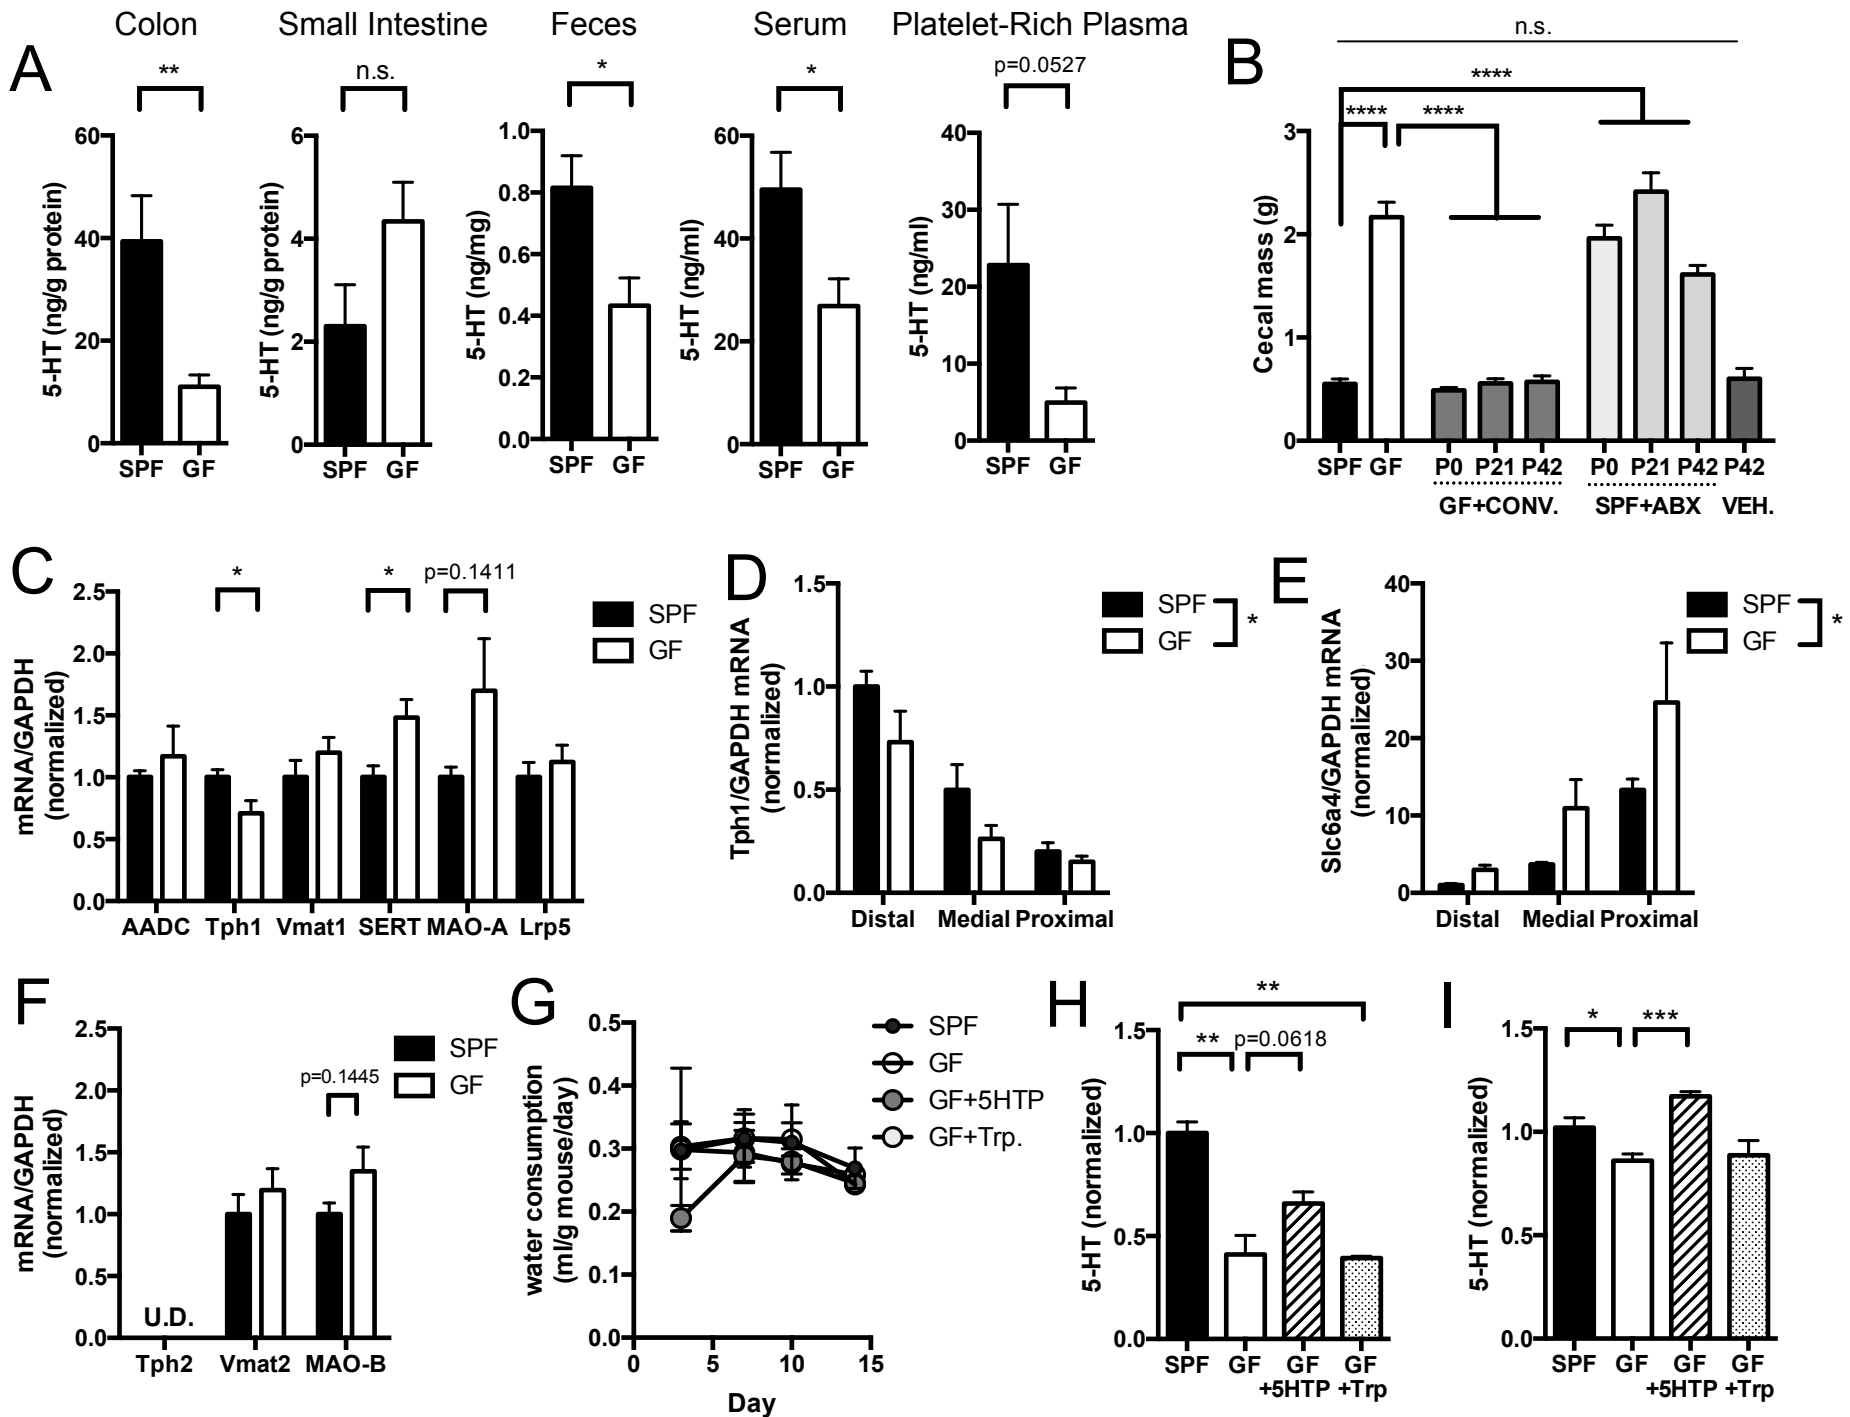

Supplement: NIHMS669675-supplement-3.pdf [file NIHMS669675-supplement-3.pdf]

**A**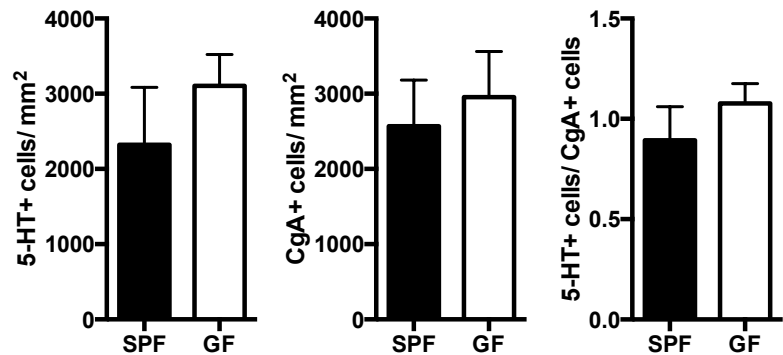**B**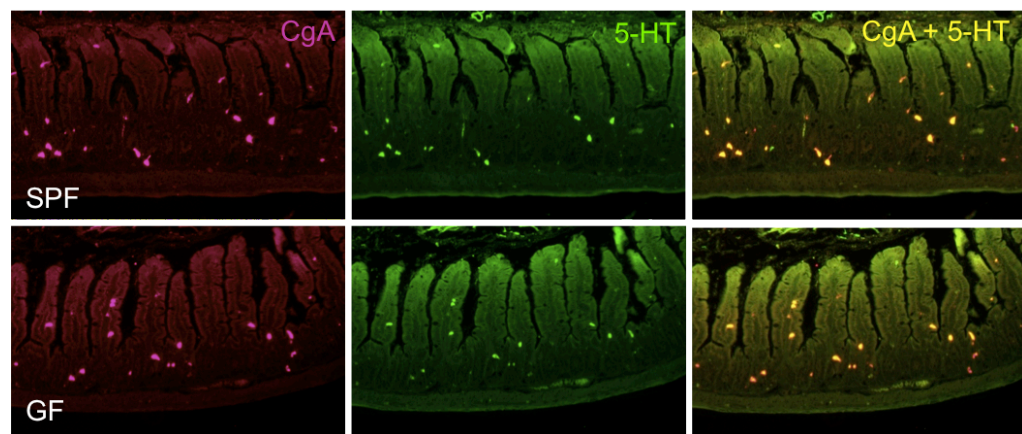**C**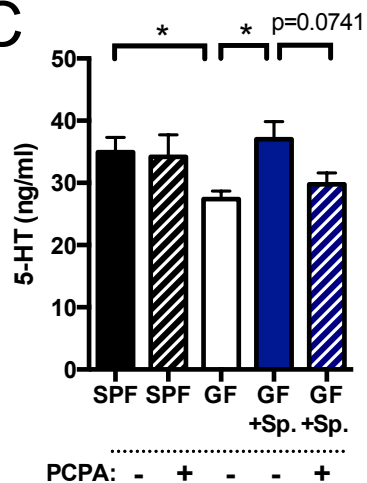**D**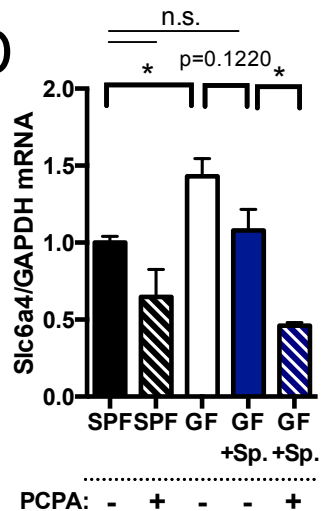**E**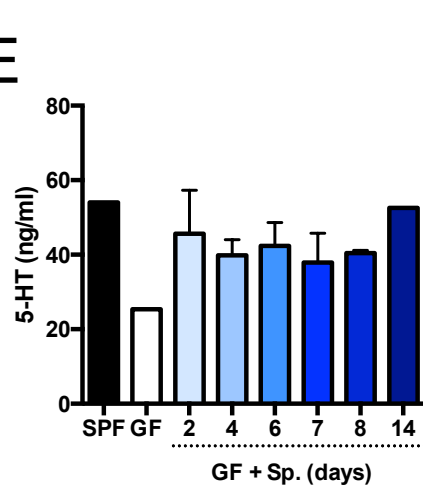**F**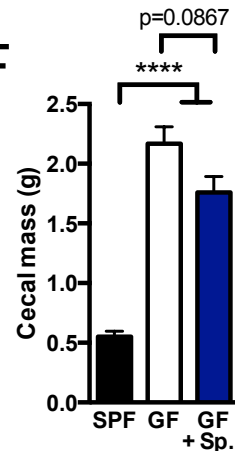**G**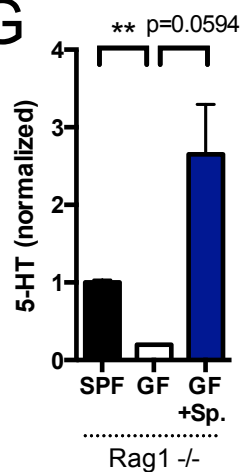

Supplement: NIHMS669675-supplement-4.pdf [file NIHMS669675-supplement-4.pdf]

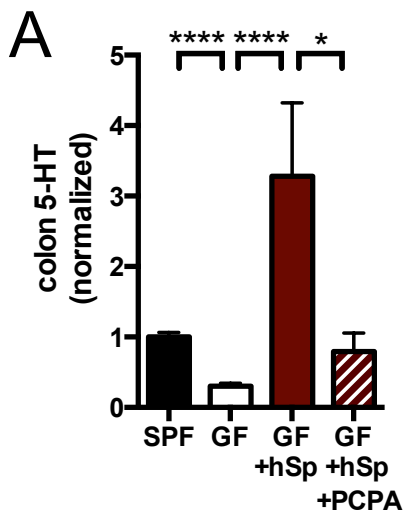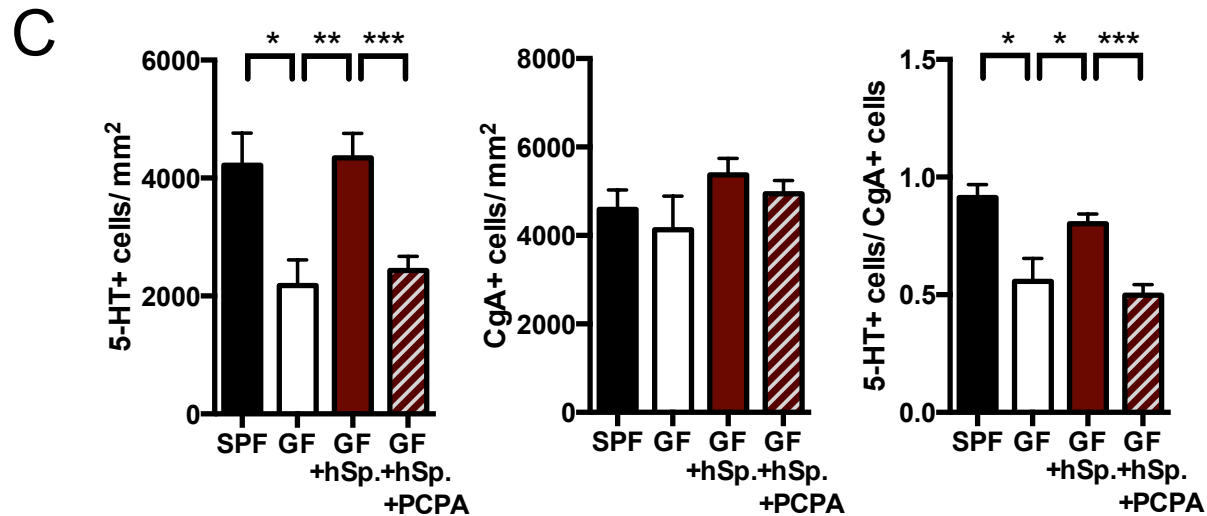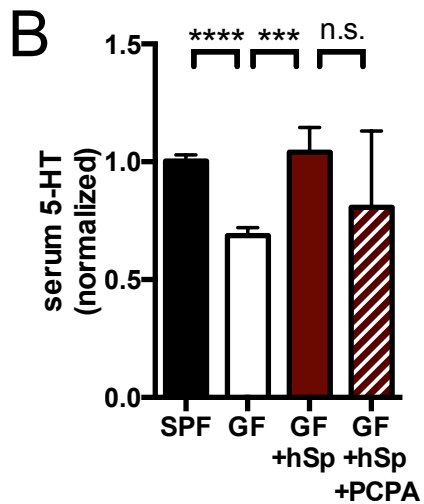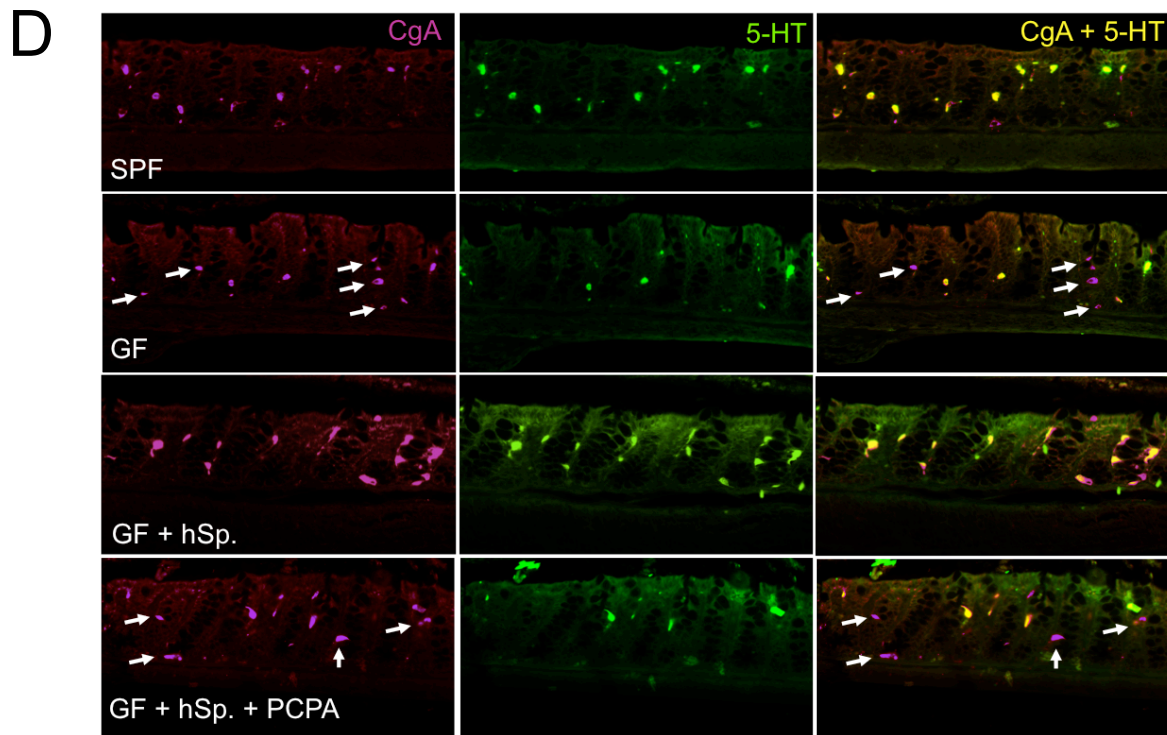

Supplement: NIHMS669675-supplement-5.pdf [file NIHMS669675-supplement-5.pdf]

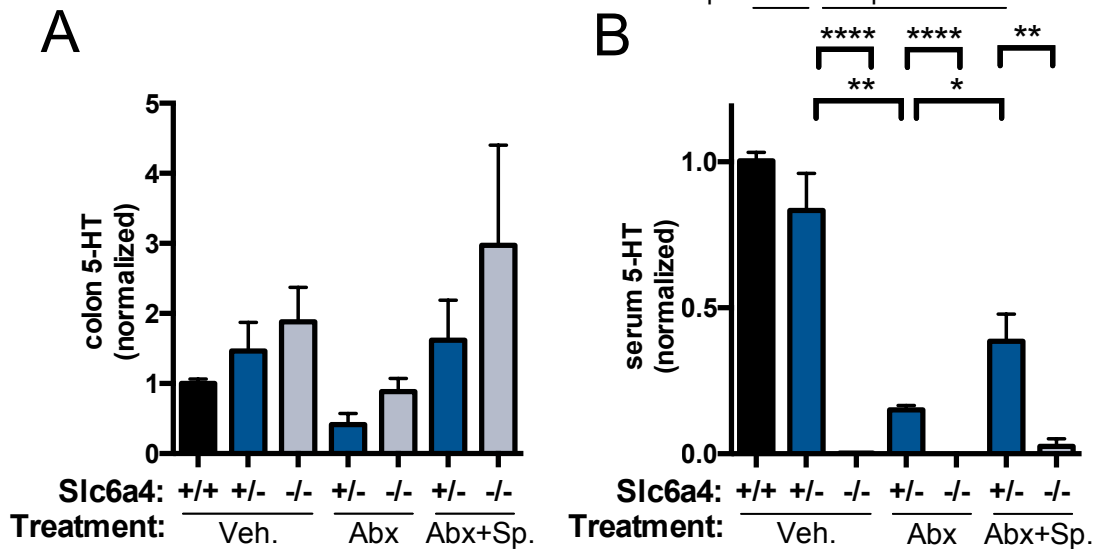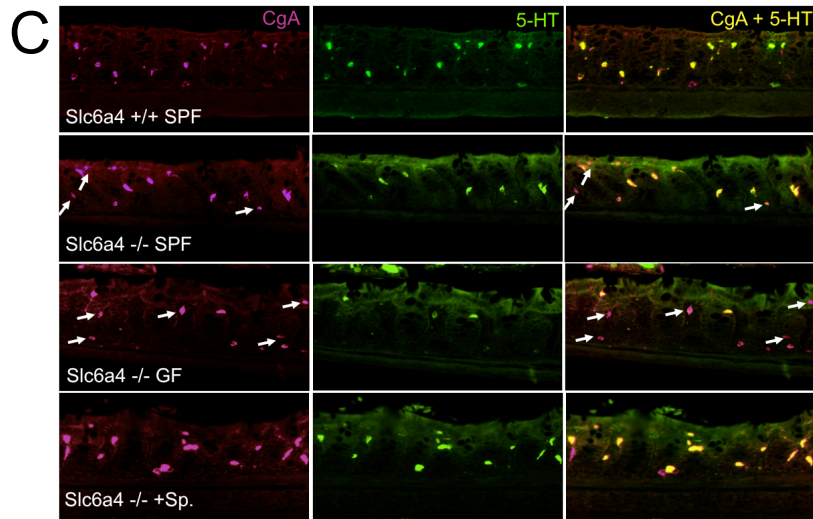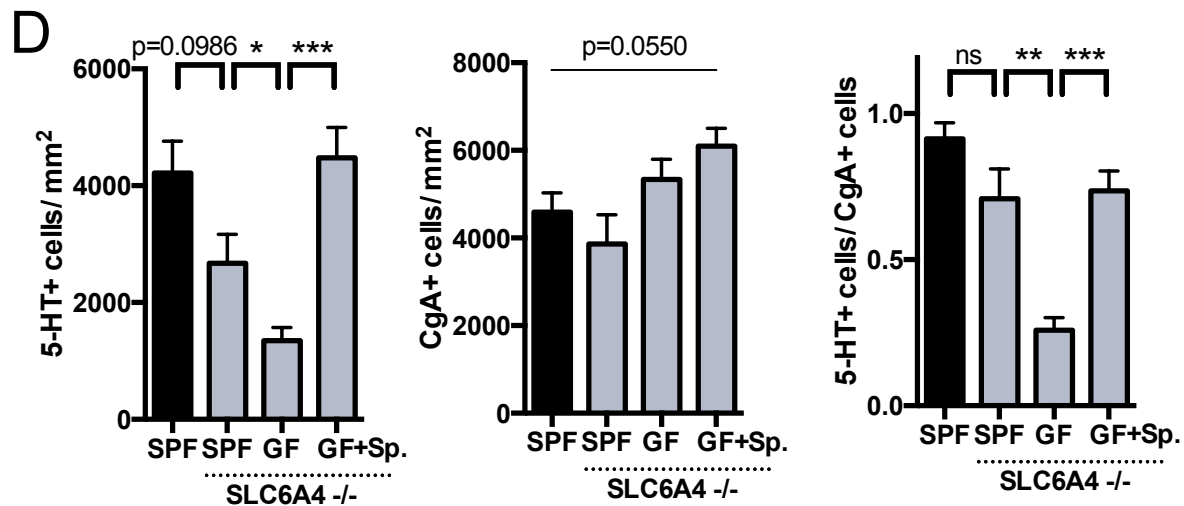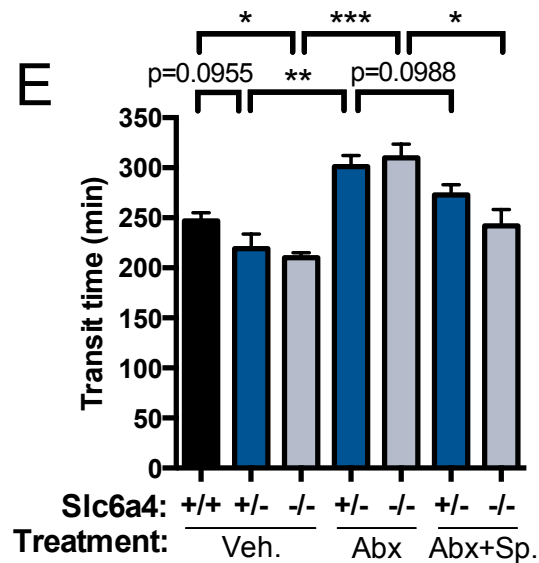

Supplement: NIHMS669675-supplement-6.pdf [file NIHMS669675-supplement-6.pdf]

**A**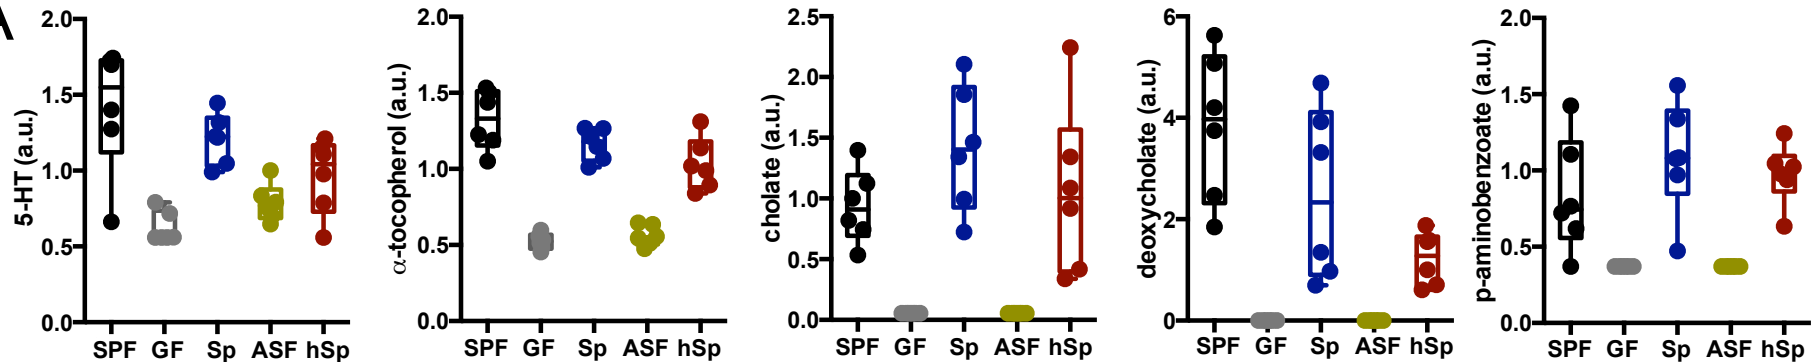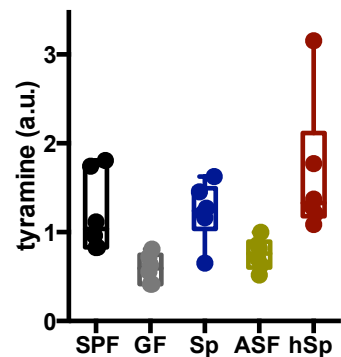**B**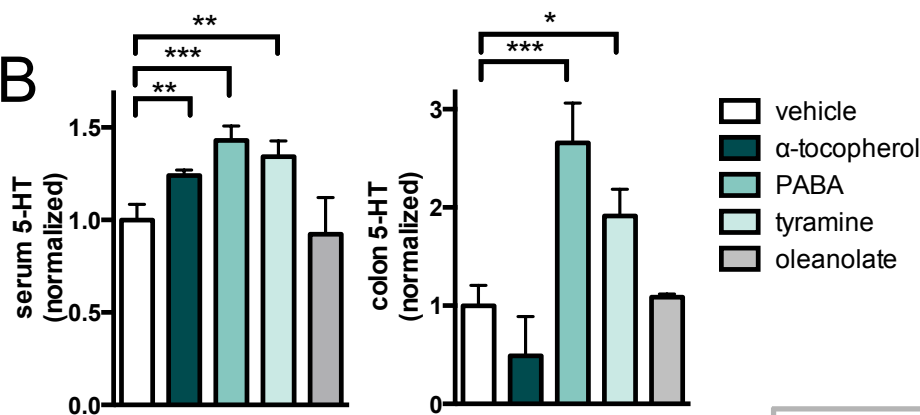**C**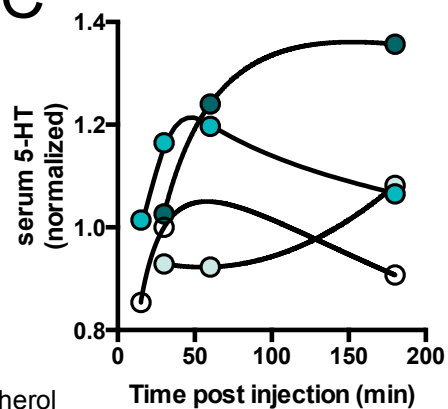**D**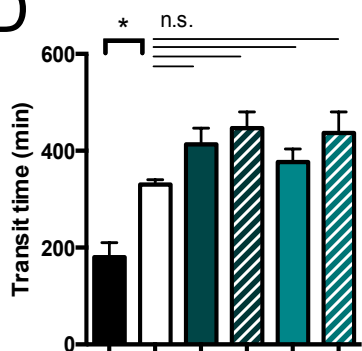**E**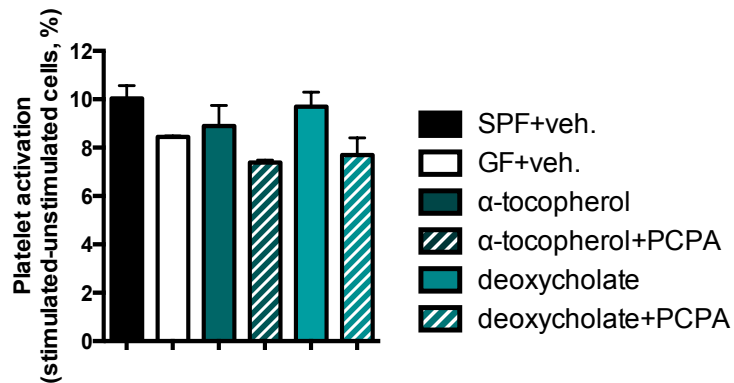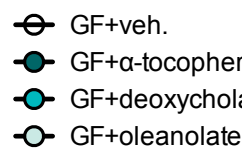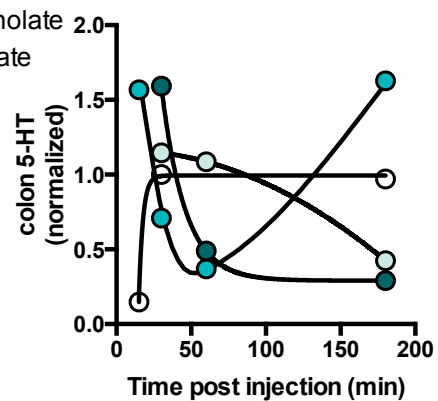

Supplement: NIHMS669675-supplement-8.pdf [file NIHMS669675-supplement-8.pdf]

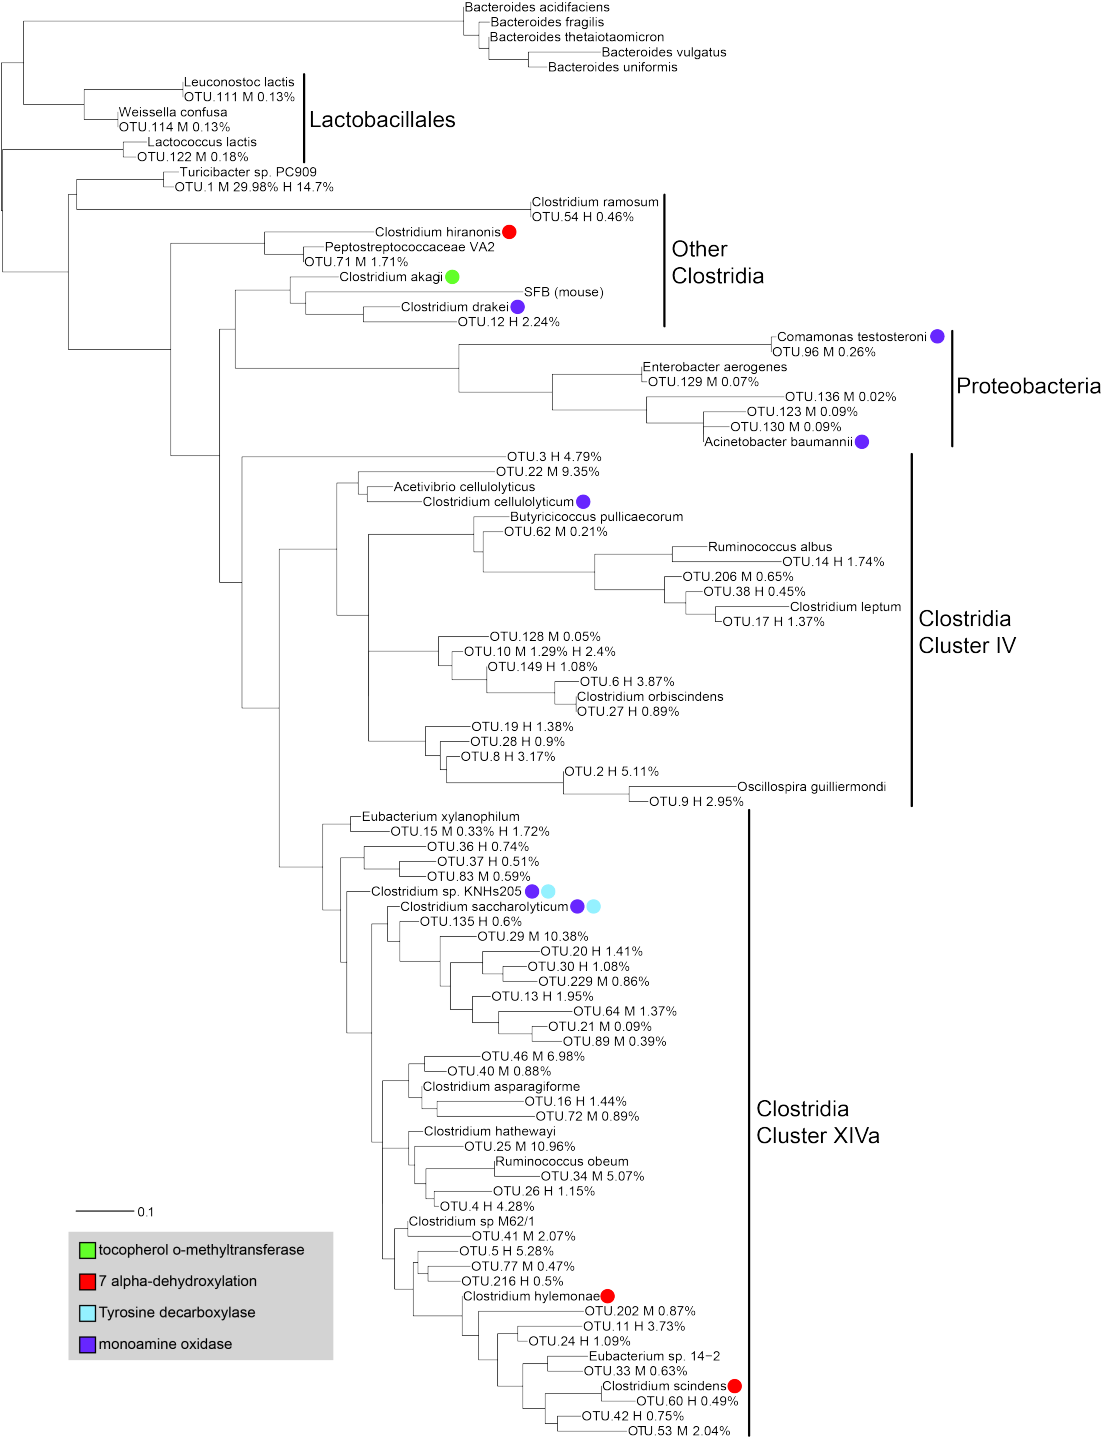

Supplement: NIHMS669675-supplement-9.pdf [file NIHMS669675-supplement-9.pdf]
